# Supplementary material for: Novel Insights into the Genetic Diversity of Balantidium and Balantidium-like Cyst-forming Ciliates
Source: PubMed Central journal article supplement (PMC3610628; doi:10.1371/journal.pntd.0002140), 2013-03-28

PhyML GTR

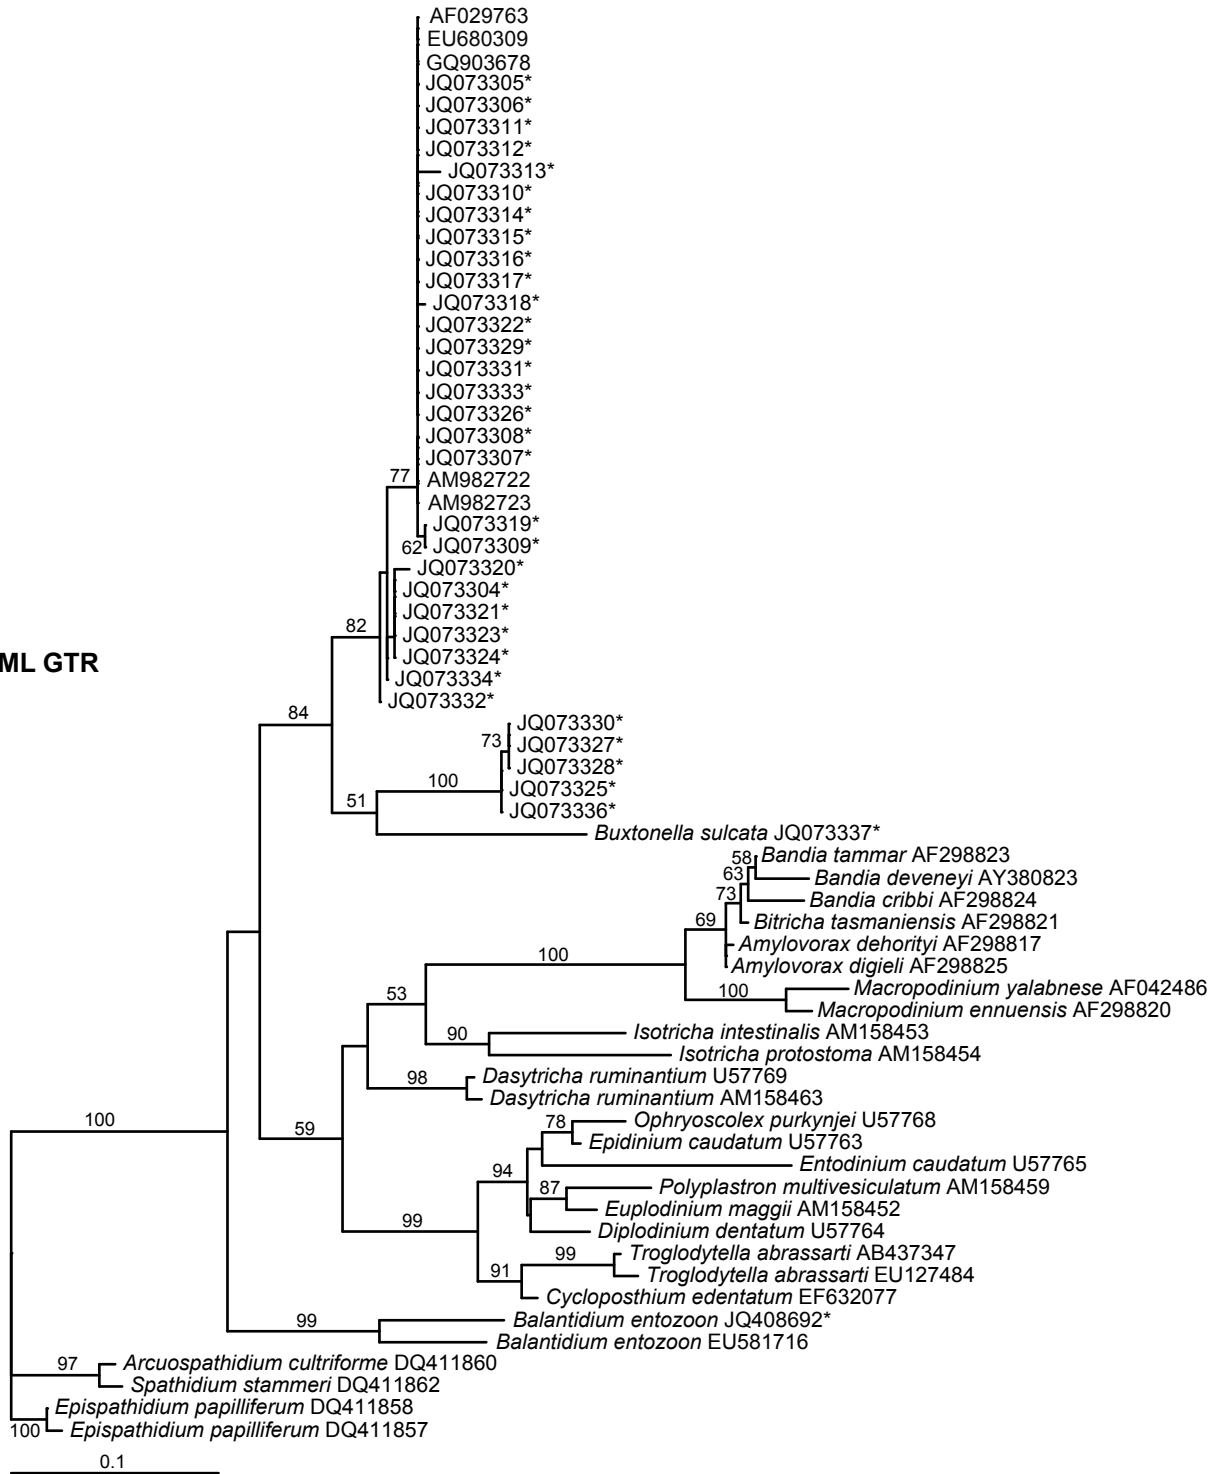

Supplement: pntd.0002140.s003.pdf [file pntd.0002140.s003.pdf]
